# Supplementary material for: Soil water sources and their implications for vegetation restoration in the Three-Rivers Headwater Region during different ablation periods
Source: Copernicus journal article supplement (doi:10.5194/hess-28-719-2024), 2024-02-16
Supplement: Supplementary file 1 [file hess-28-719-2024-supplement.pdf]

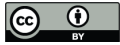

*Supplement of*

**Soil water sources and their implications for vegetation restoration in the Three-Rivers Headwater Region during different ablation periods**

**Zongxing Li et al.**

*Correspondence to:* Zongxing Li (lizxhhs@163.com)

The copyright of individual parts of the supplement might differ from the article licence.

Figure S1 Spatial correlations of soil moisture with air and ground temperatures

Figure S2 Spatial correlations of soil moisture with precipitation

Figure S3 Spatial correlations of soil moisture with Evapotranspiration

Figure S4 Spatial correlations of soil moisture with vegetation index

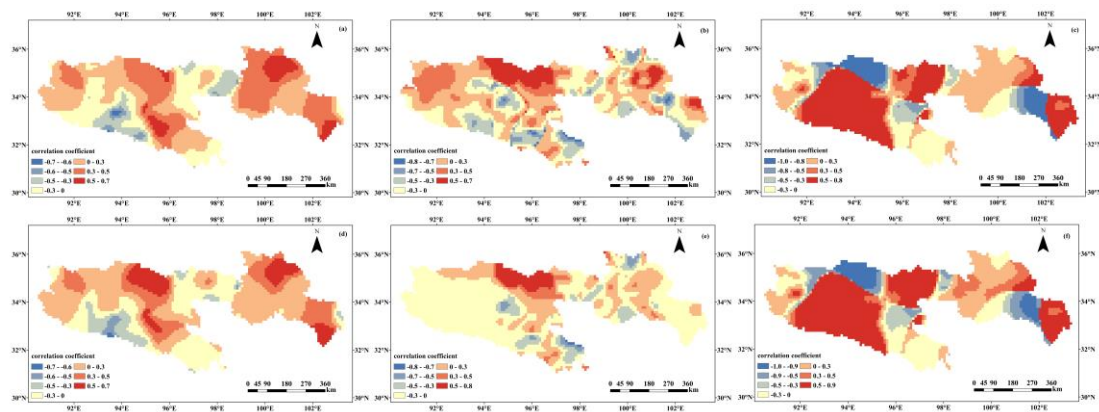

Figure S1

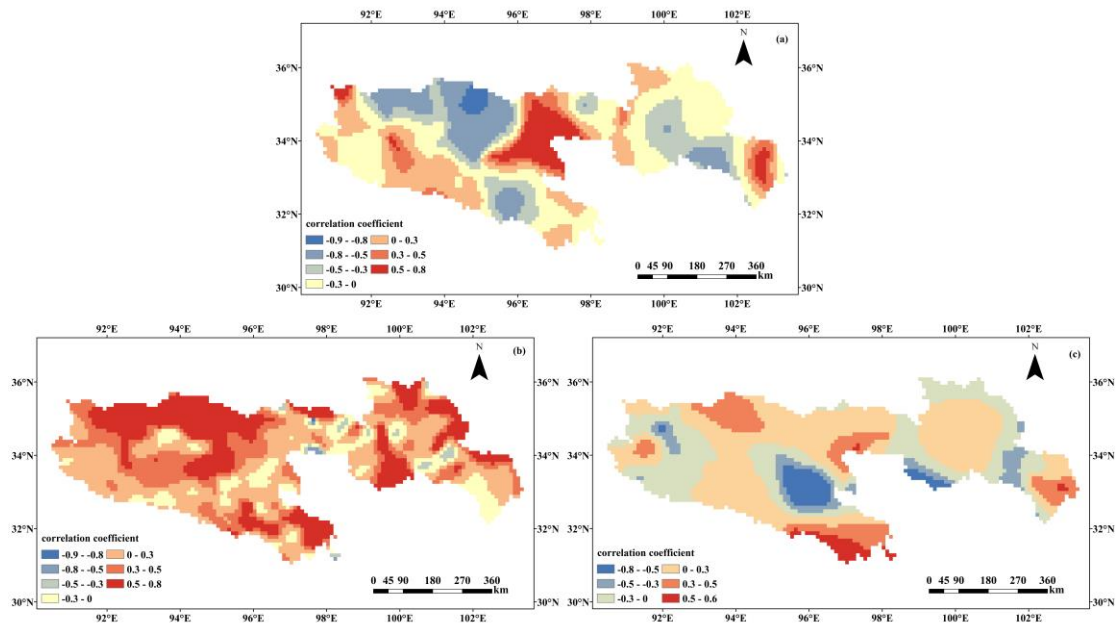

Figure S2

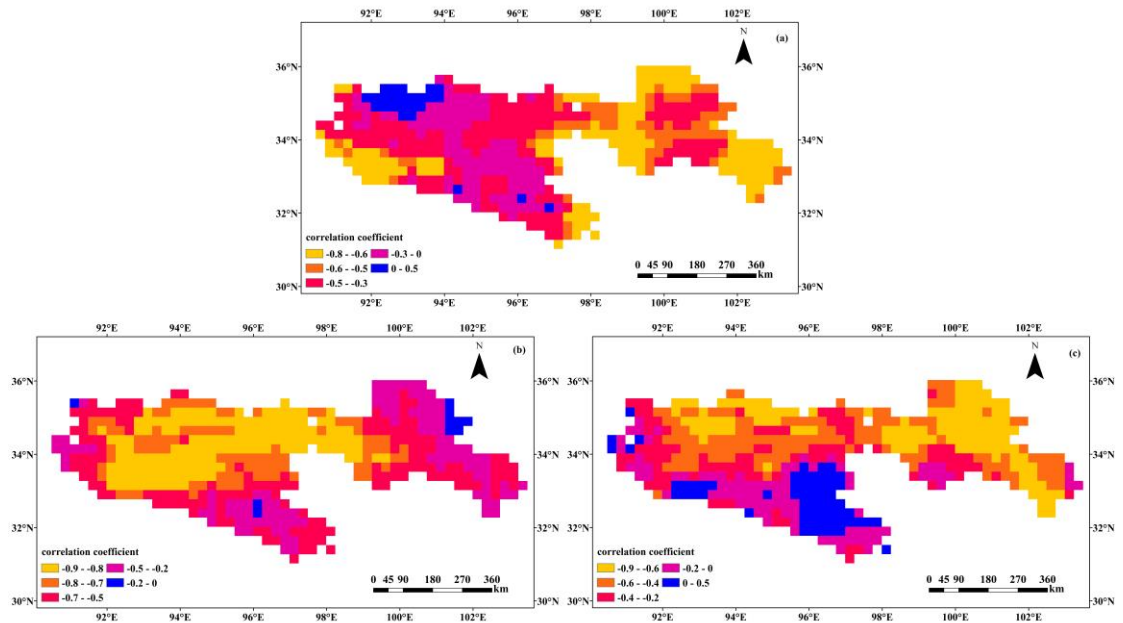

Figure S3

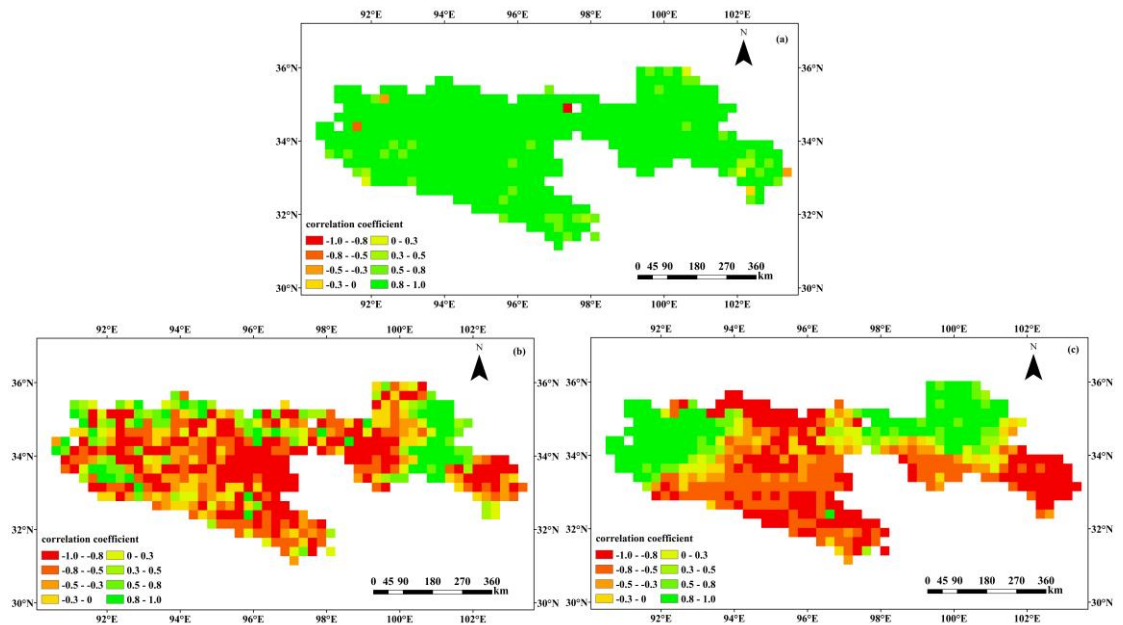

Figure S4
